# Supplementary figures and images for: Renal ischemia/reperfusion-induced cardiac hypertrophy in mice: Cardiac morphological and morphometric characterization
Source: PubMed Central journal article supplement — JRSM Cardiovasc Dis. 2017 Jan 1;6:2048004016689440. doi: 10.1177/2048004016689440 (PMC5308538; doi:10.1177/2048004016689440), 2017-01-01

Figure S1

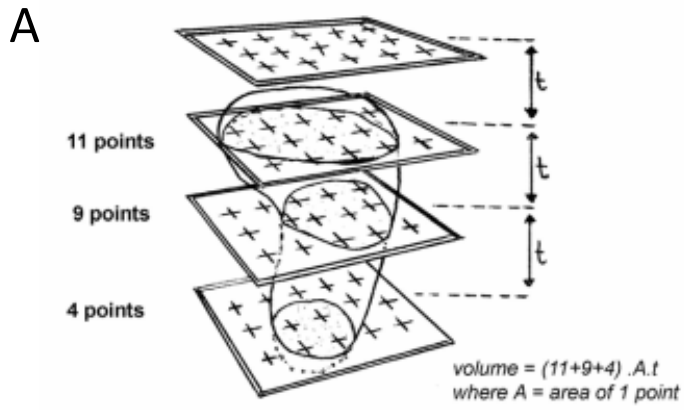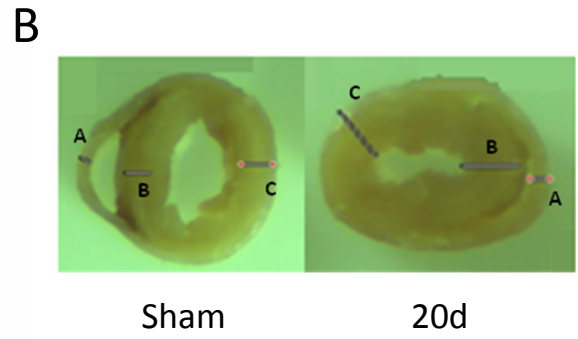

Supplement: CVD689440_supplementary_material.pdf [file CVD689440_supplementary_material.pdf]
